# Supplementary material for: Molecular biaxiality determines the helical structure – infrared measurements of the molecular order in the nematic twist-bend phase of difluoro terphenyl dimer
Source: Royal Society of Chemistry journal article supplement (doi:10.1039/d1cp00187f), 2021-01-01
Supplement: d1cp00187f1.pdf [file d1cp00187f1.pdf]

## Supplementary Information for the paper:

### Molecular biaxiality determines the helical structure - Infrared measurements of the molecular order in the N<sub>TB</sub> phase of difluoro terphenyl dimers

Katarzyna Merkel<sup>1</sup>, Barbara Loska<sup>1</sup>, Chris Welch<sup>2</sup>, Georg H. Mehl<sup>2</sup>, Antoni Kocot<sup>1</sup>

<sup>1</sup>Institute of Materials Engineering, University of Silesia, 75 Pułku Piechoty  
1A, 41-500 Chorzów, Poland

<sup>2</sup>Department of Chemistry, University of Hull, Hull HU6 7RX, UK

In order to establish the geometric parameters of the dimers and other IR spectroscopic properties, quantum mechanical density functional theory (DFT) was used [25]. All calculations were performed using the Gaussian 09 program, version E.01 [29]. Molecular structures, harmonic vibrational force constants, and absolute IR intensities were calculated using DFT theory with the Becke's three-parameter exchange functional in combination with the Lee, Yang, and Parr correlation functional the B3-LYP method with the diffusion basis set: 6-311+G [25,26]. In order to find the most stable conformation of the dimer the optimization of the geometry were performed in a few steps (see information in the SM). All possible conformation of dimers we have considered is defined by the values of dihedral angles  $\varphi_1 - \varphi_8$  (Fig 1a). In the first stage the energy barriers for the internal rotation of the terphenyl (torsional angles  $\varphi_2$  and  $\varphi_3$ ) have been determined. In a further step, energy barriers for the rotation around the dihedral angle ( $\varphi_1, \varphi_4$ ) between terphenyl and the linker / tail in the MTC5 monomer were determined. The approximate potential energy functions have been calculated at intervals of 10. In the calculations, the torsional angles ( $\varphi_1 - \varphi_4$ , each in turn) fixed at arbitrary selected values while the other geometrical parameters were optimized; relaxed potential energy scans were performed. This procedure allowed determining the values of torsion angles for which the minimum energy was obtained. As the energy barrier for the internal rotation in the alkyl chain is very small (approx. 1 kJ/mol), therefore, we did not consider any other spacer and tail conformations than the all-trans. In the next step, taking into account the determined values of torsion angles, full optimization of the geometry was performed for the DTC5C5. All DFT optimization were carried out with the following convergence criteria used with Berny algorithm: the maximum component of the force was set to 0.00045, the root-mean square (RMS) of the forces calculated for the next step—smaller than 0.0003—the computed displacement for the next step—smaller than 0.0018—and the RMS of the displacement below 0.0012. These criteria restrict the dependence of the final geometry parameters on the initial starting geometry. Therefore, the vibrational calculations were done for the most probable conformers with the lowest energy for the MTC, the DTC5C5. For B3LYP frequency calculations, a pruned 99,590 grid was used to obtain a more accurate numerical integration; it is important for computing low frequency modes. Maximal force (in atomic units) that was lower than  $3.6 \times 10^{-5}$  after geometry optimization. The rotational frequencies were very close to zero, the translational frequencies smaller than  $7.5 \text{ cm}^{-1}$ . The theoretical vibrational frequencies were scaled by one coefficient equal 0.98 in order to simplify the comparison with experiment.

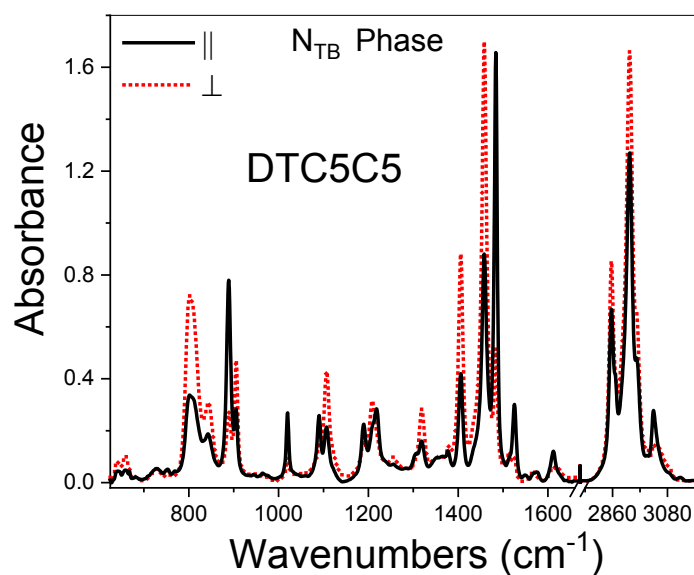

Fig.1S. Infrared spectra of DTC5C5 dimer of the planar sample for parallel - *solid black line* and perpendicular – *short dot red line*, orientation of the polarizer with respect to the alignment axis, in the twist-bend phase given as an example.

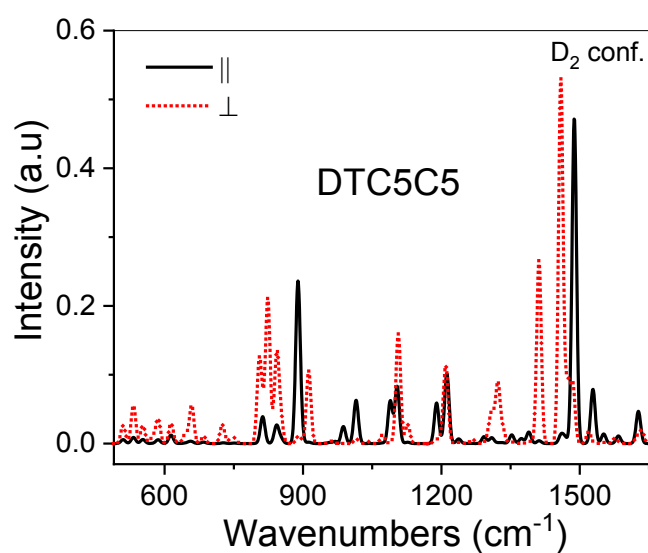

Fig2S. Theoretical spectra of the DTC5C5 dimer for the helical conformation of the terphenyl ( $\varphi_1=-43.5$ ,  $\varphi_2=-43.2$ ) using DFT method (B3LYP/6-311+G). Longitudinal transition dipole moment – *solid black line* and transverse transition dipole moment – *short dot red line*.

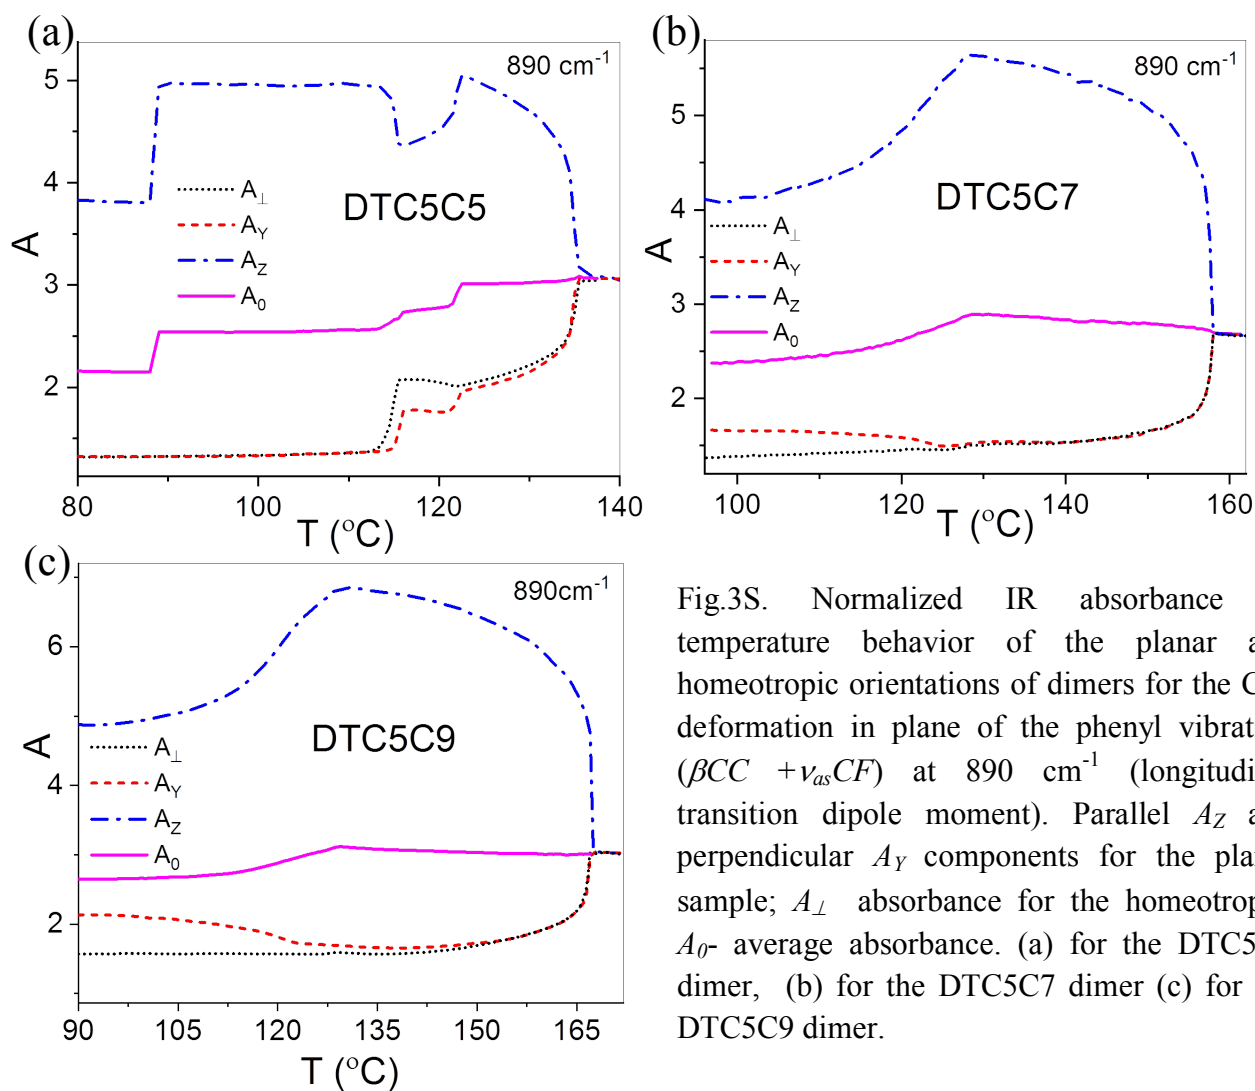

Fig.3S. Normalized IR absorbance vs temperature behavior of the planar and homeotropic orientations of dimers for the C-C deformation in plane of the phenyl vibration ( $\beta\text{CC} + \nu_{as}\text{CF}$ ) at  $890\text{ cm}^{-1}$  (longitudinal transition dipole moment). Parallel  $A_Z$  and perpendicular  $A_Y$  components for the planar sample;  $A_{\perp}$  absorbance for the homeotropic.  $A_0$ - average absorbance. (a) for the DTC5C5 dimer, (b) for the DTC5C7 dimer (c) for the DTC5C9 dimer.

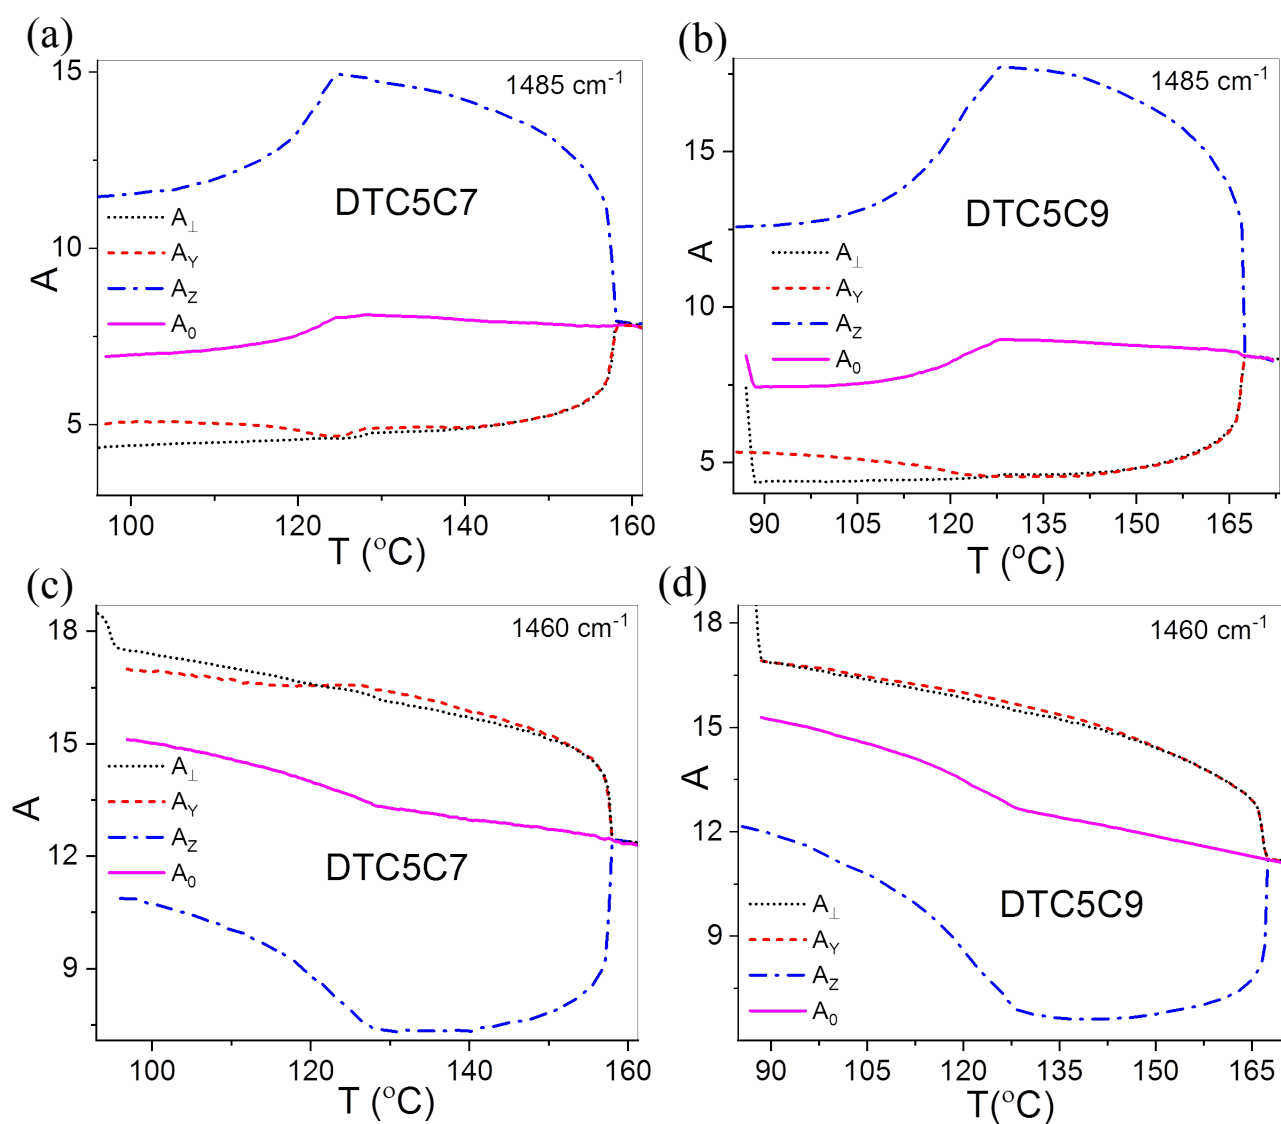

Fig.4S. Normalized IR absorbance vs temperature behavior of the planar and homeotropic orientations of dimers for the phenyl stretching band ( $\nu_{CC}$ ) at wavenumbers: 1485 and  $1460\text{cm}^{-1}$ . (a) and (b) concern the phenyl stretching band with longitudinal transition dipole moment at  $1485\text{cm}^{-1}$  wavenumber for the DTC5C7 and the DTC5C9 dimers, respectively. (c) and (d) concern the phenyl stretching band with transverse transition dipole moment at  $1460\text{cm}^{-1}$  for the DTC5C7 and the DTC5C9 dimers, as an example. Parallel  $A_Z$  and perpendicular  $A_Y$  components for the planar sample;  $A_{\perp}$  absorbance for the homeotropic.  $A_0$ -average absorbance.

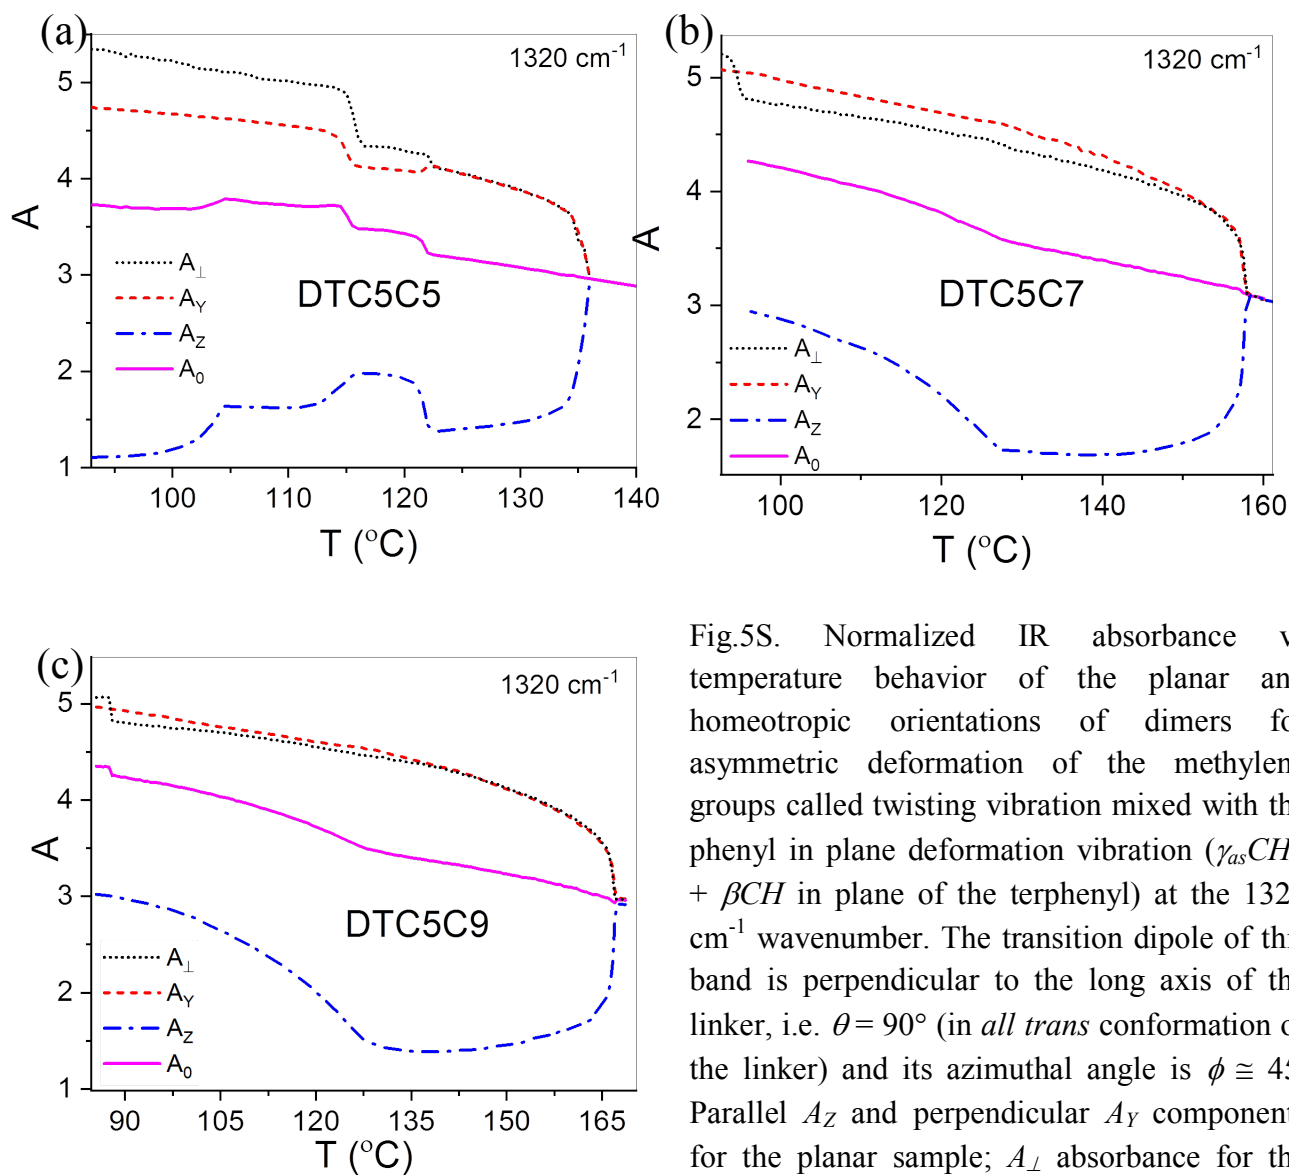

Fig.5S. Normalized IR absorbance vs temperature behavior of the planar and homeotropic orientations of dimers for asymmetric deformation of the methylene groups called twisting vibration mixed with the phenyl in plane deformation vibration ( $\gamma_{as}CH_2 + \beta CH$  in plane of the terphenyl) at the 1320  $\text{cm}^{-1}$  wavenumber. The transition dipole of this band is perpendicular to the long axis of the linker, i.e.  $\theta = 90^{\circ}$  (in *all trans* conformation of the linker) and its azimuthal angle is  $\phi \cong 45^{\circ}$ . Parallel  $A_Z$  and perpendicular  $A_Y$  components for the planar sample;  $A_{\perp}$  absorbance for the homeotropic.  $A_0$  - average absorbance. (a) for the DTC5C5 dimer, (b) for the DTC5C7 dimer (c) for the DTC5C9 dimer.
